# Supplementary material
Source: PubMed Central journal article supplement (PMC2586279)
Supplement: M807047200_1.pdf [file M807047200_1.pdf]

**NADPH OXIDASE-DEPENDENT GENERATION OF LYSO-PHOSPHATIDYLSERINE ENHANCES CLEARANCE OF ACTIVATED AND DYING NEUTROPHILS VIA G2A\***

**S. Courtney Frasch<sup>1</sup>, Karin Zemski Berry<sup>2</sup>, Ruby Fernandez-Boyanapalli<sup>1</sup>, Hyun-Sun Jin<sup>1</sup>, Christina Leslie<sup>1,3</sup>, Peter M. Henson<sup>1,3</sup>, Robert C. Murphy<sup>2</sup> and Donna L. Bratton<sup>1,3</sup>**

Department of Pediatrics<sup>1</sup> and Program in Cell Biology<sup>3</sup>, National Jewish Health, Denver, CO 80206  
Department of Pharmacology<sup>2</sup>, University of Colorado Denver, Aurora, CO 80045

**Supplemental Table 1:** *MRM transitions of oxPS species in negative ion mode*

| <i>Abbreviation</i> | <i>Structure of sn-2 side chain</i>    | <i>MRM transition</i> | <i>Reference</i> |
|---------------------|----------------------------------------|-----------------------|------------------|
| 18:0a/OH-PS         | -OH                                    | 524.5→437.5           | This study       |
| 18:1a/OH-PS         | -OH                                    | 522.5→435.5           | This study       |
| 17:1a/OH-PS (IS)    | -OH                                    | 508.5→421.5           | This study       |
| 36a:2-PS + 2O       | Linoleic acid + 2O<br>Oleic acid + 2O  | 818.7→731.7           | (1)              |
| 36a:1-PS + 2O       | Oleic acid + 2O                        | 820.7→733.7           | (1)              |
| 18:0a/9:0al (MOX)   | 9-oxononanoic acid                     | 707.6→620.5           | (2)              |
| 18:1a/9:0al (MOX)   | 9-oxononanoic acid                     | 705.6→618.5           | (2)              |
| 18:0a/5:0al (MOX)   | 5-oxovaleric acid                      | 651.6→564.5           | (2)              |
| 18:0a/9:0-COOH      | azeleic acid                           | 694.6→607.5           | (2)              |
| 18:0a/KODA (MOX)    | 9,12-dioxododec-10-enoic acid          | 790.7→703.5           | (2)              |
| 18:0a/HODA (MOX)    | 9-hydroxy-12-oxododec-10-enoic acid    | 763.7→676.5           | (2)              |
| 18:0a/KdiA (MOX)    | 9-oxo-11-carboxyundec-6-enoic acid     | 777.7→690.5           | (2)              |
| 18:0a/HdiA (MOX)    | 9-hydroxy-11-carboxyundec-6-enoic acid | 750.7→663.5           | (2)              |

## Supplemental Figure 1

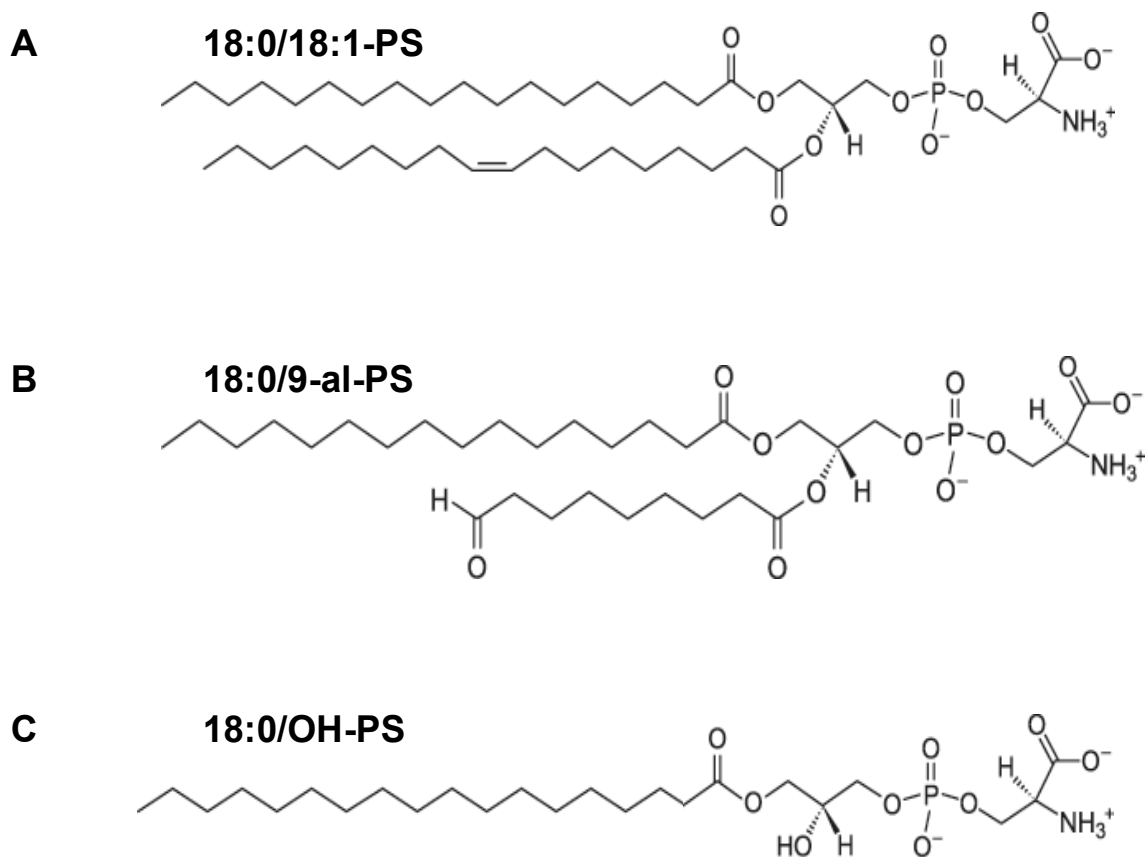

**Figure 1:** Basic structures of representative diacyl-PS, oxidized PS and lyso-PS. *A.* Diacyl-PS contains 2 fatty acyl chains in the sn-1 and sn-2 position. The fatty acid in the sn-2 position is typically a mon-unsaturated or poly-unsaturated fatty acid. *B.* Oxidized PS typically contains one chain-shortened fatty acyl group in the sn-2 position often containing a reactive group (e.g. an aldehyde or a ketone). *C.* Lyso-PS contains 1 fatty acyl chain, usually in the sn-1 position with a hydroxyl group in the sn-2 position.

## Supplemental Figure 2

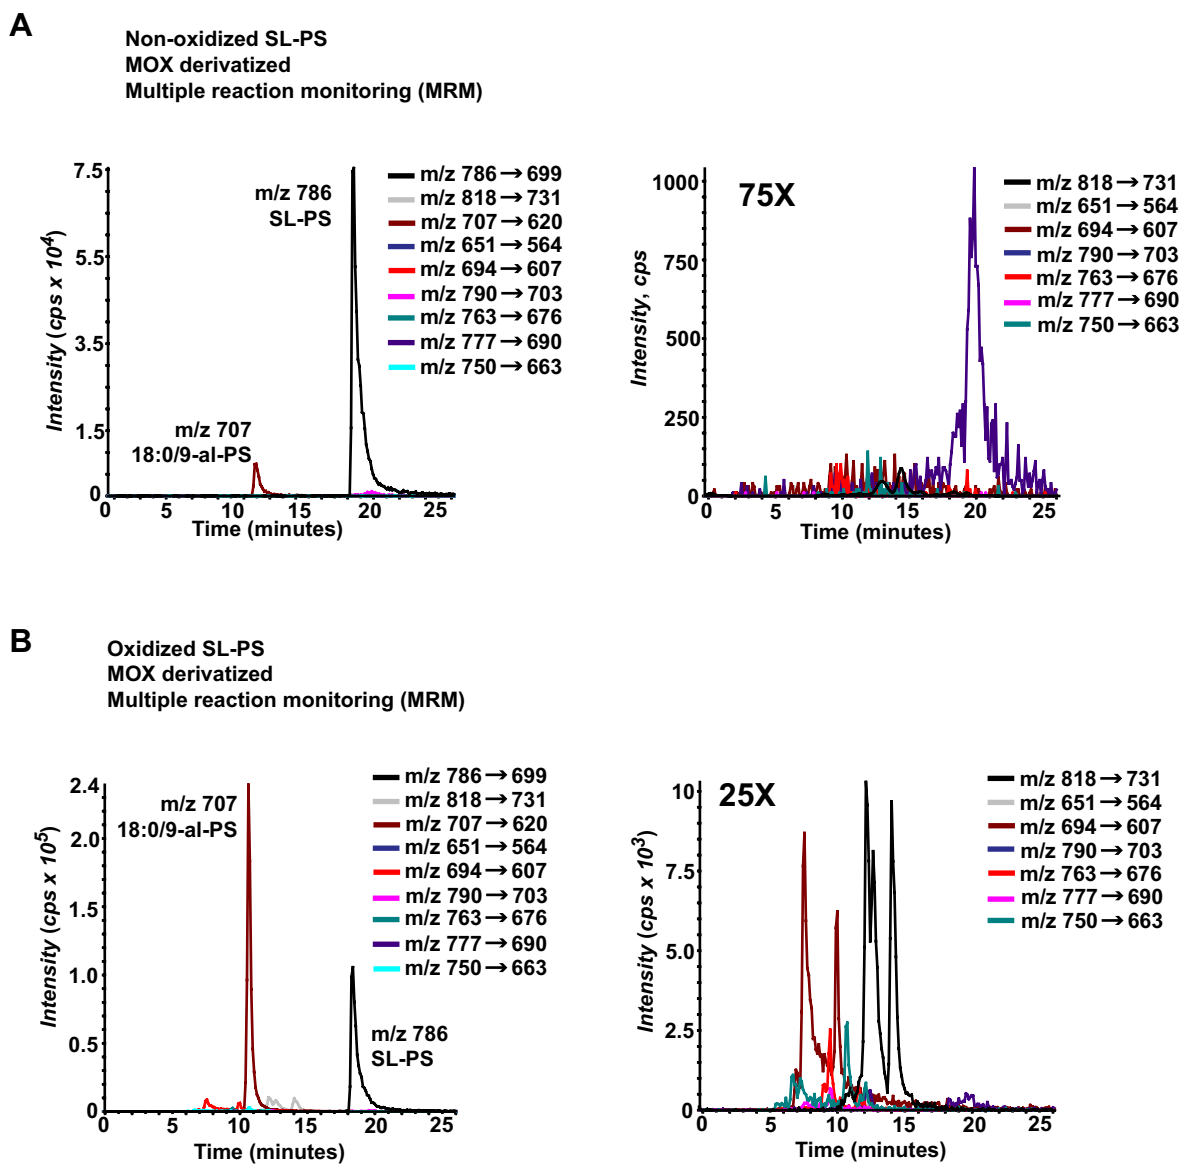

**Figure 2:** Multiple reaction monitoring (MRM) easily detects oxidized PS species resulting from the oxidation of SL-PS. *A.* Synthetic SL-PS was incubated in the absence of an oxidizing agent followed by derivatization with methoxylamine (MOX) and analyzed by MRM in the negative ion mode. Transitions monitored for all oxPS species previously characterized (1,2) are shown in the left panel (see also Supplementary table 1) demonstrating the presence of a minor amount of the aldehyde product (18:0/9-al-PS at  $m/z$  707.7). The right panel is expanded 75X to view minor oxidized species. *B.* Synthetic SL-PS was oxidized *in vitro* with AAPH and all the transitions for oxPS species previously characterized (1,2) are shown in the left panel (see also Supplementary table 1) demonstrating the aldehyde product ( $m/z$  707.7) as the most prominent species generated following oxidation. The right panel is expanded 25X demonstrating the presence of many predicted species previously identified indicating that analysis of MOX derivatized oxPS species by MRM is sensitive enough to detect even minor species.

## References

1. Kagan, V. E., Gleiss, B., Tyurina, Y. Y., Tyurin, V. A., Elenstrom-Magnusson, C., Liu, S. X., Serinkan, F. B., Arroyo, A., Chandra, J., Orrenius, S., and Fadeel, B. (2002) *Journal of Immunology* **169**, 487-499
2. Greenberg, M. E., Sun, M., Zhang, R., Febbraio, M., Silverstein, R., and Hazen, S. L. (2006) *Journal of Experimental Medicine* **203**, 2613-2625
